# Supplementary material for: An Organic Flexible Artificial Bio-Synapses with Long-Term Plasticity for Neuromorphic Computing
Source: MDPI journal article supplement (doi:10.3390/mi9050239), 2018-05-15
Supplement: s1 [file s1]

## Supporting Information

### **An Organic Flexible Artificial Bio-synapses with Long-Term Plasticity For Neuromorphic Computing**

Tianyu Wang<sup>1</sup>, Zhenyu He<sup>1</sup>, Lin Chen<sup>1\*</sup>, Hao Zhu<sup>1</sup>, Qing-Qing Sun<sup>1</sup>, Shi-Jin Ding<sup>1</sup>, Peng Zhou<sup>1</sup>, and David Wei Zhang<sup>1</sup>

*<sup>1</sup>State Key Laboratory of ASIC and System, School of Microelectronics, Fudan University, Shanghai 200433.*

Keywords: flexible organic electronics; artificial synapses; neuromorphic computing; long-term plasticity

\* Corresponding author: linchen@fudan.edu.cn, Room 403, Microelectronics Building, Fudan University, No. 220, Handan Road, Shanghai, 200433

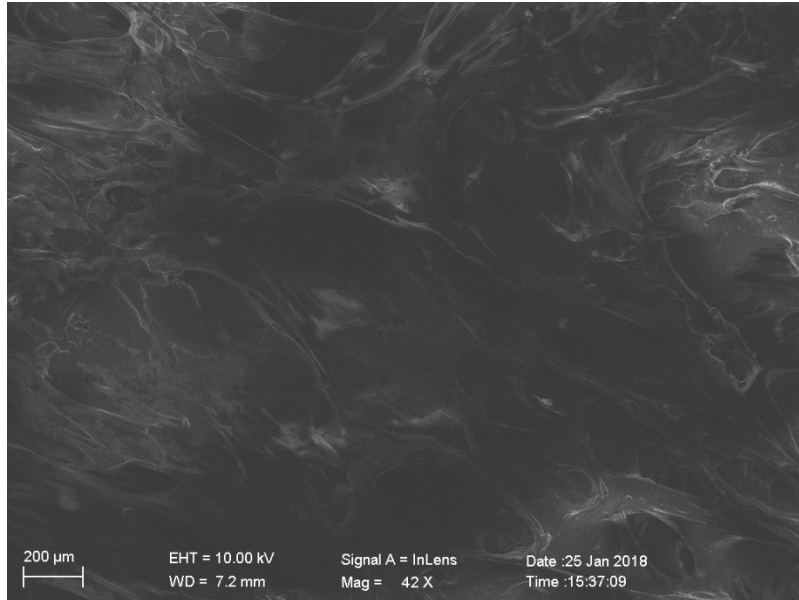

**Figure S1: SEM image of PEDOT:PSS film.** The PEDOT:PSS film was coated on the silicon to obtain its surface topography using SEM. During the testing process, the extremely high electrical voltage was set as 10kV.

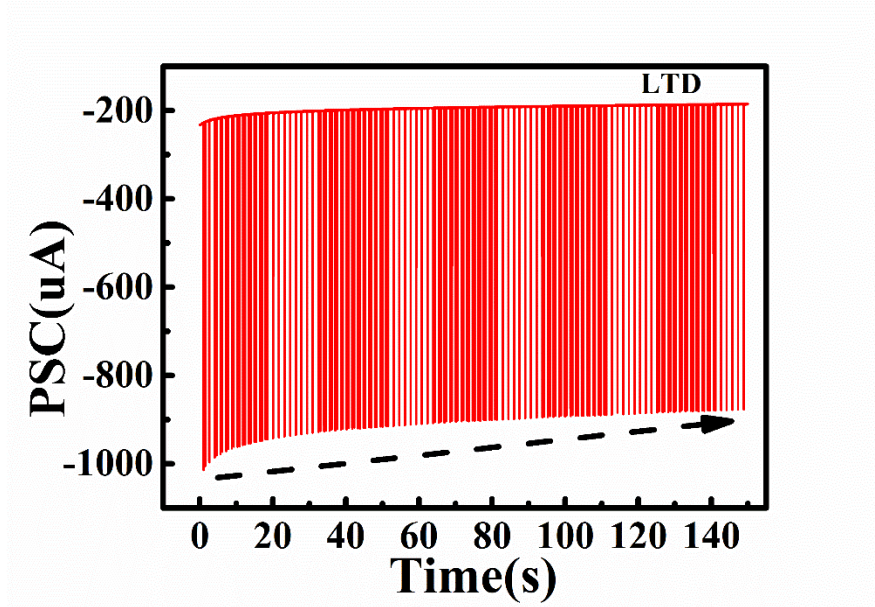

**Figure S2: Transient response during measurement of LTD.** With continuous pulse trains, the device show gradual change of transient post-synaptic currents. The current decreased with the increase of pulse number. The arrow represent the trend of post-synaptic current with applied pulses. As the voltage was applied to the top electrode continuously, the current of post synapse gradually increased.

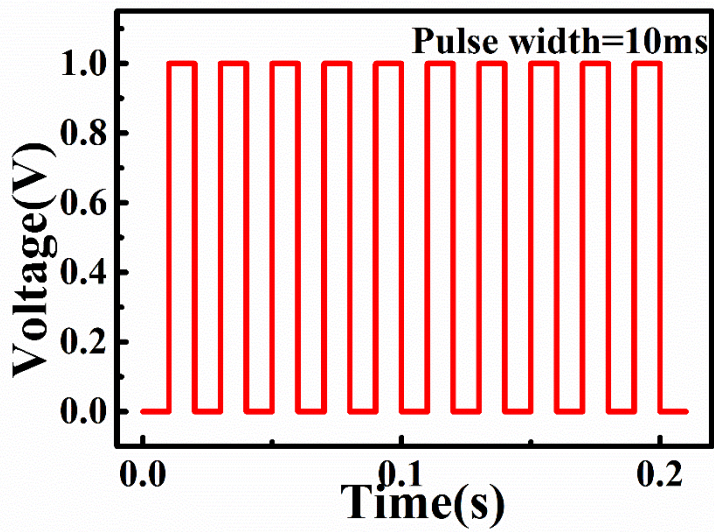

**Figure S3: Continuous pulses used for measuring the LTD.** There were 10 continuous pulses with the pulse width of 10ms and pulse amplitude of 1V. During measurement of LTD, there were 300 continuous pulses as shown in Figure S3.

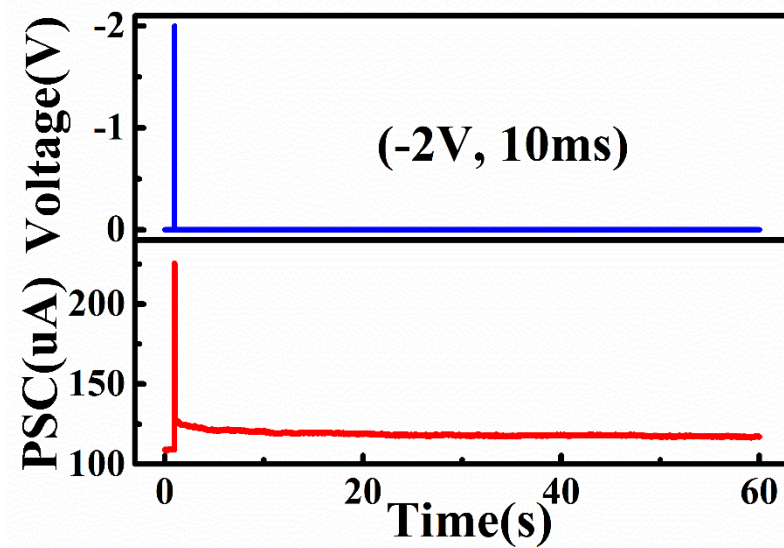

**Figure S4: The response of currents during measuring the forgetting curve.** The pre-synaptic electrode was applied a pulse with the pulse width of 10ms and pulse amplitude of -2V. The whole process during measurement was recorded under the read voltage of 0.1V.
